# Supplementary material for: Survivin Selectively Modulates Genes Deregulated in Human Leukemia Stem Cells
Source: J Oncol. 2010 Dec 23;2011:946936. doi: 10.1155/2011/946936 (PMC3021862; doi:10.1155/2011/946936)
Supplement: Supplementary file 1 — The list of genes regulated by Survivin and classified based on GO biological process or GO molecular function. [file 946936.f1.xls]

## Sheet: Sheet1
Category	Term	Count	%	PValue	Genes	List Total	Pop Hits	Pop Total	Fold Enrichment	Bonferroni	Benjamini	FDR
GOTERM_BP_FAT	GO:0022403~cell cycle phase	33	3.1015	0.000225442	NEK3,E2F5,E2F6,KNTC1,CETN2,ZFP318,C79407,APP,INCENP,STAG3,PMS2,E4F1,TCF3,BUB3,KIF11,ANAPC5,ANP32B,MSH5,SGOL1,NM_021505,CENPE,AK077138,SIRT7,MYH9,CDC26,HMGA2,9130404D08RIK,CDC27,CDK2,FMN2,CCND1,NEDD1,ZFP655,MAPRE1	679	328	13588	2.01338	0.439415	0.439415	0.398149
GOTERM_BP_FAT	GO:0022402~cell cycle process	37	3.47744	0.000324302	GAS2L3,NEK3,E2F5,E2F6,KNTC1,CETN2,ZFP318,C79407,BC024139,APP,INCENP,STAG3,PMS2,E4F1,TCF3,BUB3,CSRP2BP,KIF11,ANAPC5,ANP32B,MSH5,SGOL1,NM_021505,CENPE,AK077138,SIRT7,MYH9,CDC26,9130404D08RIK,HMGA2,CDC27,CDK2,JMY,FMN2,CCND1,NEDD1,ZFP655,MAPRE1	679	393	13588	1.88406	0.565091	0.340524	0.572272
GOTERM_BP_FAT	GO:0000278~mitotic cell cycle	26	2.44361	0.000522378	NEK3,E2F5,E2F6,KNTC1,CETN2,C79407,APP,INCENP,E4F1,TCF3,BUB3,KIF11,ANAPC5,ANP32B,SGOL1,NM_021505,CENPE,AK077138,SIRT7,HMGA2,9130404D08RIK,CDC26,CDC27,CDK2,CCND1,NEDD1,MAPRE1	679	244	13588	2.1324	0.738493	0.360519	0.920282
GOTERM_BP_FAT	GO:0009141~nucleoside triphosphate metabolic process	15	1.40977	0.00173377	ATP1B1,ATP1B3,LDHD,ATP1A3,NM_028782,ATP11A,DGUOK,ATP13A3,AK080543,ATP2C1,ENTPD3,ATP5O,ENTPD1,TBPL1,ATP8A1	679	115	13588	2.61023	0.988373	0.671629	3.02375
GOTERM_BP_FAT	GO:0007049~cell cycle	48	4.51128	0.00207336	GAS2L3,E2F5,CDC14A,E2F6,KNTC1,WTAP,APP,MCM8,INCENP,NM_145991,PMS2,STAG3,E4F1,CDC7,KIF11,ANAPC5,ANP32B,SGOL1,NM_021505,HMGA2,MYH9,CDK2,ARL3,JMY,FMN2,NM_026014,CCND1,ZFP655,MAPRE1,NEK3,CETN2,ZFP318,C79407,BC024139,NPAT,TCF3,BUB3,CSRP2BP,MSH5,AK077138,CENPE,SIRT7,9130404D08RIK,CDC26,CDC27,NEDD1,PLK3,NM_145220,CCNDBP1	679	611	13588	1.57212	0.995145	0.655467	3.60581
GOTERM_BP_FAT	GO:0007215~glutamate signaling pathway	5	0.469925	0.00306006	CLN3,APP,GNAQ,GRM6,ATP1A3	679	13	13588	7.69684	0.999617	0.730504	5.27838
GOTERM_BP_FAT	GO:0032774~RNA biosynthetic process	15	1.40977	0.00406522	TAF1B,SUPT3H,BRF1,POLR3H,SNAPC4,TAF7,SIRT7,TAF6L,TTF2,POLR2B,TAF11,PRIM1,PRIM2,AK052672,TBPL1	679	126	13588	2.38236	0.999971	0.775485	6.95407
GOTERM_BP_FAT	GO:0007601~visual perception	13	1.2218	0.00440214	IQCB1,GLRB,GPRC5C,RPGR,OPA1,NM_008938,MYO7A,DTNBP1,SAG,BBS2,PDE6D,GRM6,SPATA7	679	101	13588	2.57577	0.999988	0.757234	7.50947
GOTERM_BP_FAT	GO:0050953~sensory perception of light stimulus	13	1.2218	0.0047694	IQCB1,GLRB,GPRC5C,RPGR,OPA1,NM_008938,MYO7A,DTNBP1,SAG,BBS2,PDE6D,GRM6,SPATA7	679	102	13588	2.55052	0.999995	0.74426	8.1113
GOTERM_BP_FAT	GO:0001816~cytokine production	8	0.75188	0.00501014	AVPR2,REL,IL1RAP,SLC37A4,TLR4,IRF3,PAWR,FOXP3	679	43	13588	3.72312	0.999997	0.724546	8.50379
GOTERM_BP_FAT	GO:0046034~ATP metabolic process	12	1.12782	0.00505729	ATP1B1,AK080543,ATP1B3,ATP2C1,LDHD,ATP1A3,ATP11A,NM_028782,ATP5O,ATP13A3,ENTPD1,ATP8A1	679	90	13588	2.66824	0.999998	0.693697	8.58048
GOTERM_BP_FAT	GO:0009144~purine nucleoside triphosphate metabolic process	13	1.2218	0.00649005	ATP1B1,ATP1B3,LDHD,ATP1A3,NM_028782,ATP11A,DGUOK,ATP13A3,AK080543,ATP2C1,ATP5O,ENTPD1,ATP8A1	679	106	13588	2.45428	1	0.751635	10.8821
GOTERM_BP_FAT	GO:0045639~positive regulation of myeloid cell differentiation	6	0.56391	0.00704287	HMGB1,TNFSF11,ETS1,CSF1,MAPK14,GNAS	679	25	13588	4.80283	1	0.75232	11.7554
GOTERM_BP_FAT	GO:0000279~M phase	25	2.34962	0.00795651	NEK3,KNTC1,CETN2,ZFP318,C79407,INCENP,PMS2,STAG3,E4F1,BUB3,KIF11,ANAPC5,MSH5,SGOL1,NM_021505,CENPE,SIRT7,MYH9,HMGA2,9130404D08RIK,CDC26,CDC27,CDK2,FMN2,NEDD1,MAPRE1	679	283	13588	1.76783	1	0.768857	13.1811
GOTERM_BP_FAT	GO:0034655~nucleobase, nucleoside, nucleotide and nucleic acid catabolic process	7	0.657895	0.00816691	PYCRL,UPP1,UPP2,NM_028782,ENTPD3,ENTPD1,NT5C	679	36	13588	3.89118	1	0.754232	13.5064
GOTERM_BP_FAT	GO:0034656~nucleobase, nucleoside and nucleotide catabolic process	7	0.657895	0.00816691	PYCRL,UPP1,UPP2,NM_028782,ENTPD3,ENTPD1,NT5C	679	36	13588	3.89118	1	0.754232	13.5064
GOTERM_BP_FAT	GO:0000087~M phase of mitotic cell cycle	19	1.78571	0.0083765	KIF11,NEK3,ANAPC5,SGOL1,KNTC1,NM_021505,CETN2,CENPE,SIRT7,CDC26,HMGA2,9130404D08RIK,CDC27,CDK2,C79407,NEDD1,INCENP,MAPRE1,E4F1,BUB3	679	194	13588	1.95992	1	0.740647	13.8292
GOTERM_BP_FAT	GO:0045670~regulation of osteoclast differentiation	5	0.469925	0.00868858	TNFSF11,NM_053109,CSF1,GNAS,TOB2	679	17	13588	5.88582	1	0.732252	14.3078
GOTERM_BP_FAT	GO:0009259~ribonucleotide metabolic process	14	1.31579	0.00952026	ATP1B1,ATP1B3,LDHD,ATP1A3,NM_028782,ATP11A,ATP13A3,AK080543,ATP2C1,DHODH,ATP5O,ENTPD1,IMPDH2,ATP8A1	679	125	13588	2.24132	1	0.744415	15.571
GOTERM_BP_FAT	GO:0009205~purine ribonucleoside triphosphate metabolic process	12	1.12782	0.0118283	ATP1B1,AK080543,ATP1B3,ATP2C1,LDHD,ATP1A3,ATP11A,NM_028782,ATP5O,ATP13A3,ENTPD1,ATP8A1	679	101	13588	2.37764	1	0.79963	18.9852
GOTERM_BP_FAT	GO:0009199~ribonucleoside triphosphate metabolic process	12	1.12782	0.0126816	ATP1B1,AK080543,ATP1B3,ATP2C1,LDHD,ATP1A3,ATP11A,NM_028782,ATP5O,ATP13A3,ENTPD1,ATP8A1	679	102	13588	2.35433	1	0.805648	20.2141
GOTERM_BP_FAT	GO:0051325~interphase	8	0.75188	0.0127804	CCND1,APP,ZFP655,E2F5,ANP32B,E2F6,AK077138,TCF3	679	51	13588	3.1391	1	0.792438	20.3554
GOTERM_BP_FAT	GO:0045637~regulation of myeloid cell differentiation	8	0.75188	0.0127804	HMGB1,TNFSF11,ETS1,NM_053109,CSF1,MAPK14,GNAS,TOB2	679	51	13588	3.1391	1	0.792438	20.3554
GOTERM_BP_FAT	GO:0006468~protein amino acid phosphorylation	46	4.32331	0.0128377	FGR,NEK3,MAP4K1,TRIB3,FES,PXN,TRIB2,EPHB2,NM_021537,ACVR1B,PAK7,MAP3K6,APP,TTBK2,MAP3K3,ILK,MOS,EEF2K,MAPKBP1,CDC7,SCAMP3,TNIK,STK25,TAOK1,TRPM7,PHKG2,TRIM28,CDK9,DGUOK,MARK3,CDKL2,CDK2,STK3,MAST3,EPHA4,MAP4K5,CCND1,PLK4,PLK3,CDKL1,SCYL2,CDAN1,MAPK14,CD81,RIPK3,MAPK8IP3,NM_153788,LRRK1	679	640	13588	1.43835	1	0.778564	20.437
GOTERM_BP_FAT	GO:0006793~phosphorus metabolic process	59	5.54511	0.0132533	CDC14A,SYNJ1,FES,NM_021537,ACVR1B,PAK7,MAP3K6,APP,ILK,MOS,EEF2K,ATP5O,MAPKBP1,CDC7,SCAMP3,TNIK,STK25,TRPM7,PTPRG,PHKG2,PIK3CD,CDK9,DGUOK,MARK3,CDKL2,STK3,CDK2,MAST3,MAP4K5,CCND1,CDKL1,SCYL2,CD81,RIPK3,LRRK1,FGR,NEK3,SSH2,MAP4K1,TRIB3,PXN,TRIB2,EPHB2,TTBK2,MAP3K3,DUSP16,GPD2,TAOK1,TRIM28,PTPN13,EPHA4,PLK4,PLK3,CDAN1,MAPK14,MAPK8IP3,NM_153788,GYK,FUK,PGK1,DUSP7	679	866	13588	1.36339	1	0.774418	21.0277
GOTERM_BP_FAT	GO:0006796~phosphate metabolic process	59	5.54511	0.0132533	CDC14A,SYNJ1,FES,NM_021537,ACVR1B,PAK7,MAP3K6,APP,ILK,MOS,EEF2K,ATP5O,MAPKBP1,CDC7,SCAMP3,TNIK,STK25,TRPM7,PTPRG,PHKG2,PIK3CD,CDK9,DGUOK,MARK3,CDKL2,STK3,CDK2,MAST3,MAP4K5,CCND1,CDKL1,SCYL2,CD81,RIPK3,LRRK1,FGR,NEK3,SSH2,MAP4K1,TRIB3,PXN,TRIB2,EPHB2,TTBK2,MAP3K3,DUSP16,GPD2,TAOK1,TRIM28,PTPN13,EPHA4,PLK4,PLK3,CDAN1,MAPK14,MAPK8IP3,NM_153788,GYK,FUK,PGK1,DUSP7	679	866	13588	1.36339	1	0.774418	21.0277
GOTERM_BP_FAT	GO:0051301~cell division	24	2.25564	0.0138304	CDC14A,NEK3,KNTC1,CETN2,C79407,INCENP,POU3F3,E4F1,CDC7,KIF11,ANAPC5,SGOL1,NM_021505,CENPE,9130404D08RIK,HMGA2,CDC26,MYH9,CDC27,CDK2,ARL3,FMN2,NEDD1,CCND1,MAPRE1	679	281	13588	1.70919	1	0.774538	21.841
GOTERM_BP_FAT	GO:0045672~positive regulation of osteoclast differentiation	3	0.281955	0.0139461	TNFSF11,CSF1,GNAS	679	4	13588	15.0088	1	0.763561	22.003
GOTERM_BP_FAT	GO:0000280~nuclear division	18	1.69173	0.0142974	KIF11,NEK3,ANAPC5,SGOL1,KNTC1,NM_021505,CETN2,CENPE,CDC26,HMGA2,9130404D08RIK,CDC27,CDK2,C79407,NEDD1,INCENP,MAPRE1,E4F1,BUB3	679	190	13588	1.89585	1	0.758716	22.4932
GOTERM_BP_FAT	GO:0007067~mitosis	18	1.69173	0.0142974	KIF11,NEK3,ANAPC5,SGOL1,KNTC1,NM_021505,CETN2,CENPE,CDC26,HMGA2,9130404D08RIK,CDC27,CDK2,C79407,NEDD1,INCENP,MAPRE1,E4F1,BUB3	679	190	13588	1.89585	1	0.758716	22.4932
GOTERM_BP_FAT	GO:0005996~monosaccharide metabolic process	18	1.69173	0.014994	PHKA2,GPD2,ADPGK,PHKG2,ALDOC,SLC37A4,PGD,GALT,PGLS,RENBP,NISCH,MAPK14,OTOG,ENO3,PGK1,FPGT,XYLB,ENO1	679	191	13588	1.88593	1	0.762201	23.4567
GOTERM_BP_FAT	GO:0009150~purine ribonucleotide metabolic process	13	1.2218	0.0156295	ATP1B1,ATP1B3,LDHD,ATP1A3,NM_028782,ATP11A,ATP13A3,AK080543,ATP2C1,ATP5O,ENTPD1,IMPDH2,ATP8A1	679	119	13588	2.18616	1	0.764067	24.3259
GOTERM_BP_FAT	GO:0016310~phosphorylation	50	4.69925	0.015938	FES,NM_021537,PAK7,MAP3K6,ACVR1B,APP,ILK,MOS,EEF2K,ATP5O,MAPKBP1,CDC7,SCAMP3,TNIK,STK25,TRPM7,PHKG2,PIK3CD,CDK9,DGUOK,MARK3,CDKL2,STK3,CDK2,MAST3,MAP4K5,CCND1,CDKL1,SCYL2,CD81,RIPK3,LRRK1,FGR,NEK3,TRIB3,MAP4K1,PXN,TRIB2,EPHB2,TTBK2,MAP3K3,TAOK1,TRIM28,EPHA4,PLK4,PLK3,CDAN1,MAPK14,MAPK8IP3,NM_153788,FUK,PGK1	679	718	13588	1.39358	1	0.758805	24.7444
GOTERM_BP_FAT	GO:0044270~nitrogen compound catabolic process	7	0.657895	0.0171051	PYCRL,UPP1,UPP2,NM_028782,ENTPD3,ENTPD1,NT5C	679	42	13588	3.3353	1	0.771515	26.3081
GOTERM_BP_FAT	GO:0006974~response to DNA damage stimulus	24	2.25564	0.0173712	TRPC2,AK152420,MSH5,POLE,RAD9B,APTX,AK077138,PMAIP1,XRCC1,SMUG1,JMY,UBE2N,AK053890,AK084443,CCND1,ERCC5,MUTYH,CHD1L,MAPK14,NM_145540,PMS2,FANCG,APEX1,RTEL1	679	287	13588	1.67346	1	0.765684	26.6603
GOTERM_BP_FAT	GO:0009166~nucleotide catabolic process	6	0.56391	0.0176204	UPP1,UPP2,NM_028782,ENTPD3,ENTPD1,NT5C	679	31	13588	3.87325	1	0.759753	26.9887
GOTERM_BP_FAT	GO:0006351~transcription, DNA-dependent	13	1.2218	0.0187025	TAF1B,SUPT3H,POLR3H,BRF1,SNAPC4,TAF7,SIRT7,TAF6L,TTF2,POLR2B,TAF11,AK052672,TBPL1	679	122	13588	2.1324	1	0.769753	28.3987
GOTERM_BP_FAT	GO:0048285~organelle fission	18	1.69173	0.019745	KIF11,NEK3,ANAPC5,SGOL1,KNTC1,NM_021505,CETN2,CENPE,CDC26,HMGA2,9130404D08RIK,CDC27,CDK2,C79407,NEDD1,INCENP,MAPRE1,E4F1,BUB3	679	197	13588	1.82849	1	0.77813	29.7328
GOTERM_BP_FAT	GO:0009142~nucleoside triphosphate biosynthetic process	11	1.03383	0.0198801	ATP1B1,AK080543,ATP1B3,ATP2C1,LDHD,ATP1A3,ATP11A,ATP5O,ATP13A3,TBPL1,ATP8A1	679	95	13588	2.31715	1	0.770707	29.904
GOTERM_BP_FAT	GO:0006754~ATP biosynthetic process	10	0.93985	0.0206966	ATP1B1,AK080543,ATP1B3,ATP2C1,LDHD,ATP1A3,ATP11A,ATP5O,ATP13A3,ATP8A1	679	82	13588	2.44046	1	0.774913	30.9301
GOTERM_BP_FAT	GO:0019318~hexose metabolic process	16	1.50376	0.0219377	PHKA2,GPD2,ADPGK,PHKG2,ALDOC,SLC37A4,PGD,GALT,PGLS,RENBP,NISCH,MAPK14,ENO3,PGK1,FPGT,ENO1	679	169	13588	1.89461	1	0.785393	32.4627
GOTERM_BP_FAT	GO:0035235~ionotropic glutamate receptor signaling pathway	3	0.281955	0.022479	CLN3,APP,ATP1A3	679	5	13588	12.0071	1	0.784726	33.121
GOTERM_BP_FAT	GO:0009260~ribonucleotide biosynthetic process	12	1.12782	0.0226044	ATP1B1,AK080543,ATP1B3,ATP2C1,LDHD,DHODH,ATP1A3,ATP11A,ATP5O,ATP13A3,IMPDH2,ATP8A1	679	111	13588	2.16344	1	0.777962	33.2725
GOTERM_BP_FAT	GO:0045787~positive regulation of cell cycle	6	0.56391	0.0255444	HMGB1,APP,CENPE,AK077138,PROX1,TCF3	679	34	13588	3.53149	1	0.809978	36.7363
GOTERM_BP_FAT	GO:0051656~establishment of organelle localization	6	0.56391	0.0255444	FMN2,MYO7A,MYH9,SLIT1,NTN1,SCRIB	679	34	13588	3.53149	1	0.809978	36.7363
GOTERM_BP_FAT	GO:0046907~intracellular transport	32	3.00752	0.0264984	VPS29,COPZ2,SEC24B,AP1M2,AP1G2,MLPH,TIMM10,NAPA,POLA2,RAB7,APP,TAP2,MCOLN1,VPS16,SCAMP3,STX3,IPO13,SPIRE1,MYH9,NUP155,NM_178069,ANKRD27,SLC25A14,AAAS,ERBB2IP,ATP2C1,TSC2,ARCN1,NM_025516,GGA2,GGA3,TRAPPC2	679	431	13588	1.48579	1	0.813894	37.8233
GOTERM_BP_FAT	GO:0046486~glycerolipid metabolic process	13	1.2218	0.0276039	CAV3,AK152420,CHKB,PIK3CD,SLC37A4,SYNJ1,NM_019543,PIGQ,INSIG2,CD81,SLC22A4,ANGPTL3,PTDSS1	679	129	13588	2.01669	1	0.819288	39.0608
GOTERM_BP_FAT	GO:0006281~DNA repair	19	1.78571	0.0292762	TRPC2,MSH5,POLE,RAD9B,APTX,XRCC1,SMUG1,JMY,UBE2N,AK053890,AK084443,ERCC5,MUTYH,CHD1L,NM_145540,PMS2,FANCG,APEX1,RTEL1	679	222	13588	1.71272	1	0.830315	40.8888
GOTERM_BP_FAT	GO:0044271~nitrogen compound biosynthetic process	24	2.25564	0.0293835	PYCRL,ATP1B1,PCBD2,ATP1B3,HMBS,LDHD,ATP1A3,ATP11A,PSPH,ATP13A3,TYMS,CTH,AK080543,ATP2C1,ARG2,SPNB1,TMLHE,QTRTD1,DHODH,AANAT,ATP5O,IMPDH2,TBPL1,ATP8A1	679	302	13588	1.59034	1	0.824471	41.0043
GOTERM_BP_FAT	GO:0051329~interphase of mitotic cell cycle	7	0.657895	0.034085	CCND1,APP,E2F5,ANP32B,E2F6,AK077138,TCF3	679	49	13588	2.85883	1	0.861692	45.8613
GOTERM_BP_FAT	GO:0051726~regulation of cell cycle	18	1.69173	0.03949	HMGB1,COPS5,E2F5,AK077138,CENPE,PROX1,SCRIB,CCND1,HDAC3,SIN3B,APP,PLK4,NM_026014,ZFP655,MAPK14,NM_145540,E4F1,TCF3	679	214	13588	1.68323	1	0.894433	50.9785
GOTERM_BP_FAT	GO:0009152~purine ribonucleotide biosynthetic process	11	1.03383	0.040895	ATP1B1,AK080543,ATP1B3,ATP2C1,LDHD,ATP1A3,ATP11A,ATP5O,ATP13A3,IMPDH2,ATP8A1	679	107	13588	2.05729	1	0.897769	52.2319
GOTERM_BP_FAT	GO:0009206~purine ribonucleoside triphosphate biosynthetic process	10	0.93985	0.0421799	ATP1B1,AK080543,ATP1B3,ATP2C1,LDHD,ATP1A3,ATP11A,ATP5O,ATP13A3,ATP8A1	679	93	13588	2.1518	1	0.900211	53.3516
GOTERM_BP_FAT	GO:0009201~ribonucleoside triphosphate biosynthetic process	10	0.93985	0.0421799	ATP1B1,AK080543,ATP1B3,ATP2C1,LDHD,ATP1A3,ATP11A,ATP5O,ATP13A3,ATP8A1	679	93	13588	2.1518	1	0.900211	53.3516
GOTERM_BP_FAT	GO:0019320~hexose catabolic process	7	0.657895	0.0438406	PGLS,ADPGK,ALDOC,PGD,ENO3,PGK1,ENO1	679	52	13588	2.69389	1	0.904495	54.7622
GOTERM_BP_FAT	GO:0006007~glucose catabolic process	7	0.657895	0.0438406	PGLS,ADPGK,ALDOC,PGD,ENO3,PGK1,ENO1	679	52	13588	2.69389	1	0.904495	54.7622
GOTERM_BP_FAT	GO:0000012~single strand break repair	3	0.281955	0.0441714	TRPC2,APTX,XRCC1	679	7	13588	8.57648	1	0.901664	55.0383
GOTERM_BP_FAT	GO:0009145~purine nucleoside triphosphate biosynthetic process	10	0.93985	0.044678	ATP1B1,AK080543,ATP1B3,ATP2C1,LDHD,ATP1A3,ATP11A,ATP5O,ATP13A3,ATP8A1	679	94	13588	2.12891	1	0.899799	55.4581
GOTERM_BP_FAT	GO:0006006~glucose metabolic process	13	1.2218	0.0472577	PHKA2,GPD2,ADPGK,ALDOC,PHKG2,PGD,SLC37A4,PGLS,NISCH,MAPK14,ENO3,PGK1,ENO1	679	140	13588	1.85824	1	0.908354	57.539
GOTERM_BP_FAT	GO:0006259~DNA metabolic process	30	2.81955	0.0499059	POLA2,XRCC1,SMUG1,PRIM1,AK084443,MUTYH,ERCC5,MCM8,CHD1L,PRIM2,NM_145540,PMS2,E4F1,FANCG,DNMT3B,APEX1,TCF3,RTEL1,TRPC2,GLRB,POLG,MSH5,POLE,RAD9B,APTX,JMY,UBE2N,AK053890,NM_026014,ORC5L	679	421	13588	1.42602	1	0.916218	59.5796
GOTERM_BP_FAT	GO:0051640~organelle localization	7	0.657895	0.051222	FMN2,MLPH,MYO7A,MYH9,SLIT1,NTN1,SCRIB	679	54	13588	2.59412	1	0.917875	60.5589
GOTERM_BP_FAT	GO:0046365~monosaccharide catabolic process	7	0.657895	0.051222	PGLS,ADPGK,ALDOC,PGD,ENO3,PGK1,ENO1	679	54	13588	2.59412	1	0.917875	60.5589
GOTERM_BP_FAT	GO:0002761~regulation of myeloid leukocyte differentiation	5	0.469925	0.0542208	TNFSF11,NM_053109,CSF1,GNAS,TOB2	679	29	13588	3.45031	1	0.925862	62.7075
GOTERM_BP_FAT	GO:0019321~pentose metabolic process	3	0.281955	0.0569835	PGD,OTOG,XYLB	679	8	13588	7.50442	1	0.932082	64.5887
GOTERM_BP_FAT	GO:0006163~purine nucleotide metabolic process	14	1.31579	0.0570411	ATP1B1,ATP1B3,LDHD,ATP1A3,NM_028782,ATP11A,DGUOK,ATP13A3,AK080543,ATP2C1,ATP5O,ENTPD1,IMPDH2,ATP8A1	679	160	13588	1.75103	1	0.928997	64.6269
GOTERM_BP_FAT	GO:0009116~nucleoside metabolic process	7	0.657895	0.0593185	PANK4,PYCRL,QTRTD1,DHODH,UPP1,UPP2,TBPL1	679	56	13588	2.50147	1	0.933226	66.1085
GOTERM_BP_FAT	GO:0015674~di-, tri-valent inorganic cation transport	14	1.31579	0.059365	TRPC2,TRPM7,TRPV2,CACNG7,TRPA1,SFXN4,TRPM2,AK080543,CATSPER2,ATP2C1,TRPV5,SLC25A28,SLC30A5,MCOLN1	679	161	13588	1.74015	1	0.930242	66.1381
GOTERM_BP_FAT	GO:0007612~learning	7	0.657895	0.0636366	CLN3,APP,AAAS,DRD2,SYNJ1,ATP1A3,EPHB2	679	57	13588	2.45759	1	0.93998	68.7582
GOTERM_BP_FAT	GO:0016192~vesicle-mediated transport	32	3.00752	0.0637257	VPS29,CAV3,COPZ2,SEC24B,AP1M2,AP1G2,MYO7A,SYNJ1,NAPA,ABCA1,SCRIB,STXBP5L,APP,TRAPPC6B,MCOLN1,TRPC2,CLN3,GLRB,STX3,AK050865,SPIRE1,ANKRD27,PREB,GAPVD1,CADPS2,ARCN1,MAPK8IP3,NM_025516,GGA2,GGA3,SH3GL2,TRAPPC2	679	466	13588	1.3742	1	0.937398	68.8108
GOTERM_BP_FAT	GO:0034404~nucleobase, nucleoside and nucleotide biosynthetic process	15	1.40977	0.0641174	ATP1B1,ATP1B3,LDHD,ATP1A3,ATP11A,ATP13A3,TYMS,AK080543,ATP2C1,QTRTD1,DHODH,ATP5O,IMPDH2,TBPL1,ATP8A1	679	179	13588	1.67696	1	0.935661	69.0409
GOTERM_BP_FAT	GO:0034654~nucleobase, nucleoside, nucleotide and nucleic acid biosynthetic process	15	1.40977	0.0641174	ATP1B1,ATP1B3,LDHD,ATP1A3,ATP11A,ATP13A3,TYMS,AK080543,ATP2C1,QTRTD1,DHODH,ATP5O,IMPDH2,TBPL1,ATP8A1	679	179	13588	1.67696	1	0.935661	69.0409
GOTERM_BP_FAT	GO:0006350~transcription	103	9.68045	0.065269	ARNT2,MED25,CBX7,PRIM1,GABPB1,ZFP472,SIN3B,PRIM2,HOXC5,NM_145991,ZFP276,TBPL1,NM_026107,HDAC10,ZFP467,ZHX3,TAF6L,PROX1,ZFP592,MGA,ZFP516,IRAK1BP1,TRAPPC2,NM_198644,MYEF2,SFPI1,CXXC1,ZFP451,TCF3,TAF2,MAFF,AEBP2,MAFB,TAF7,AK161656,FOXP3,HDAC3,ETS1,TRPS1,PPRC1,RFX3,HIVEP1,HDAC6,ADAR,TAF1B,E2F5,E2F6,A630033E08RIK,PAWR,1600027N09RIK,NM_007615,AK084443,MCM8,AK052672,ZFP238,FOXB1,E4F1,ALX3,DEDD2,ZFP239,…	679	1772	13588	1.16321	1	0.936086	69.7081
GOTERM_BP_FAT	GO:0006476~protein amino acid deacetylation	4	0.37594	0.0660877	HDAC3,HDAC10,SIRT7,HDAC6	679	19	13588	4.21301	1	0.935584	70.1741
GOTERM_BP_FAT	GO:0032886~regulation of microtubule-based process	6	0.56391	0.0720977	BBS2,PLK4,MTAP1B,CENPE,MAPRE1,HDAC6	679	45	13588	2.66824	1	0.94793	73.3939
GOTERM_BP_FAT	GO:0034330~cell junction organization	5	0.469925	0.0731373	CD9,ITGA5,ITGB3,CXADR,PXN	679	32	13588	3.12684	1	0.947869	73.9164
GOTERM_BP_FAT	GO:0034613~cellular protein localization	22	2.06767	0.0731451	COPZ2,OXA1L,SEC24B,SCAMP3,AP1M2,STX3,AP1G2,IPO13,MLPH,TIMM10,NAPA,POLA2,PMAIP1,RAB7,BBS2,ERBB2IP,TAP2,TSC2,ARCN1,VPS16,GGA2,GGA3	679	299	13588	1.47244	1	0.945536	73.9203
GOTERM_BP_FAT	GO:0007212~dopamine receptor signaling pathway	4	0.37594	0.0749775	GNAL,GNAQ,DRD2,GNAS	679	20	13588	4.00236	1	0.947247	74.8177
GOTERM_BP_FAT	GO:0070727~cellular macromolecule localization	22	2.06767	0.0769375	COPZ2,OXA1L,SEC24B,SCAMP3,AP1M2,STX3,AP1G2,IPO13,MLPH,TIMM10,NAPA,POLA2,PMAIP1,RAB7,BBS2,ERBB2IP,TAP2,TSC2,ARCN1,VPS16,GGA2,GGA3	679	301	13588	1.46266	1	0.949126	75.7453
GOTERM_BP_FAT	GO:0033554~cellular response to stress	28	2.63158	0.0770054	PMAIP1,XRCC1,SMUG1,HNRPLL,AK084443,MUTYH,ERCC5,CHD1L,NM_145540,PMS2,FANCG,APEX1,MAPKBP1,RTEL1,TRPC2,AK152420,CLN3,MSH5,POLE,APTX,RAD9B,AK077138,JMY,UBE2N,AK053890,CCND1,MAPK14,MAPK8IP3	679	404	13588	1.38696	1	0.947058	75.7768
GOTERM_BP_FAT	GO:0044275~cellular carbohydrate catabolic process	7	0.657895	0.0776703	PGLS,ADPGK,ALDOC,PGD,ENO3,PGK1,ENO1	679	60	13588	2.33471	1	0.94624	76.0837
GOTERM_BP_FAT	GO:0046474~glycerophospholipid biosynthetic process	6	0.56391	0.077737	AK152420,CHKB,CD81,NM_019543,PTDSS1,PIGQ	679	46	13588	2.61023	1	0.944156	76.1143
GOTERM_BP_FAT	GO:0043123~positive regulation of I-kappaB kinase/NF-kappaB cascade	5	0.469925	0.0800956	UBE2N,TNFSF11,ATP2C1,TLR4,EDA	679	33	13588	3.03209	1	0.946907	77.1724
GOTERM_BP_FAT	GO:0006816~calcium ion transport	11	1.03383	0.0802939	TRPC2,AK080543,CATSPER2,ATP2C1,TRPM7,CACNG7,TRPV2,TRPA1,TRPV5,MCOLN1,TRPM2	679	121	13588	1.81925	1	0.94517	77.2593
GOTERM_BP_FAT	GO:0045859~regulation of protein kinase activity	15	1.40977	0.0820613	CAV3,CSF1,TRIB3,AK077138,CENPE,TLR4,PXN,TRIB2,APP,CD81,TSC2,DUSP16,DGKZ,MAPK8IP3,MAPKBP1	679	186	13588	1.61385	1	0.946637	78.0203
GOTERM_BP_FAT	GO:0034329~cell junction assembly	4	0.37594	0.0843638	CD9,ITGA5,ITGB3,PXN	679	21	13588	3.81177	1	0.94905	78.9756
GOTERM_BP_FAT	GO:0009143~nucleoside triphosphate catabolic process	3	0.281955	0.0857704	NM_028782,ENTPD3,ENTPD1	679	10	13588	6.00353	1	0.949688	79.5399
GOTERM_BP_FAT	GO:0051270~regulation of cell motion	10	0.93985	0.0862909	BBS2,HMGB1,NISCH,LAMA5,DRD2,CSF1,CBLL1,ITGB3,ANGPTL3,NTN1	679	107	13588	1.87026	1	0.948693	79.745
GOTERM_BP_FAT	GO:0008344~adult locomotory behavior	7	0.657895	0.0879189	EPHA4,SNCG,GLRB,APP,DRD2,OTOG,ATP1A3	679	62	13588	2.25939	1	0.949726	80.3741
GOTERM_BP_FAT	GO:0030334~regulation of cell migration	9	0.845865	0.0881681	HMGB1,NISCH,LAMA5,DRD2,CSF1,CBLL1,ITGB3,ANGPTL3,NTN1	679	92	13588	1.95767	1	0.948267	80.4688
GOTERM_BP_FAT	GO:0040008~regulation of growth	19	1.78571	0.0909738	NOG,DRD2,CSF1,SOCS6,HMGA2,CXADR,1600027N09RIK,NTN1,PROX1,PPAN,ADRB3,BBS2,HDAC3,APP,GPC3,CD81,NM_153788,E4F1,IGFBP5	679	256	13588	1.48525	1	0.951333	81.5053
GOTERM_BP_FAT	GO:0006213~pyrimidine nucleoside metabolic process	4	0.37594	0.0942218	PYCRL,DHODH,UPP1,TBPL1	679	22	13588	3.63851	1	0.954859	82.6404
GOTERM_BP_FAT	GO:0009069~serine family amino acid metabolic process	4	0.37594	0.0942218	CTH,SHMT2,GCLC,PSPH	679	22	13588	3.63851	1	0.954859	82.6404
GOTERM_BP_FAT	GO:0009165~nucleotide biosynthetic process	14	1.31579	0.0954235	ATP1B1,ATP1B3,LDHD,ATP1A3,ATP11A,ATP13A3,TYMS,AK080543,ATP2C1,DHODH,ATP5O,TBPL1,IMPDH2,ATP8A1	679	174	13588	1.61014	1	0.955027	83.0434
GOTERM_BP_FAT	GO:0050918~positive chemotaxis	2	0.18797	0.0973077	TSC2,SCRIB	679	2	13588	20.0118	1	0.956216	83.6576
GOTERM_BP_FAT	GO:0042094~interleukin-2 biosynthetic process	2	0.18797	0.0973077	IL1RAP,PAWR	679	2	13588	20.0118	1	0.956216	83.6576
GOTERM_BP_FAT	GO:0051295~establishment of meiotic spindle localization	2	0.18797	0.0973077	FMN2,MYH9	679	2	13588	20.0118	1	0.956216	83.6576
GOTERM_BP_FAT	GO:0032914~positive regulation of transforming growth factor-beta1 production	2	0.18797	0.0973077	CX3CL1,FOXP3	679	2	13588	20.0118	1	0.956216	83.6576
GOTERM_BP_FAT	GO:0032908~regulation of transforming growth factor-beta1 production	2	0.18797	0.0973077	CX3CL1,FOXP3	679	2	13588	20.0118	1	0.956216	83.6576
GOTERM_BP_FAT	GO:0040012~regulation of locomotion	10	0.93985	0.0983675	BBS2,HMGB1,NISCH,LAMA5,DRD2,CSF1,CBLL1,ITGB3,ANGPTL3,NTN1	679	110	13588	1.81925	1	0.956158	83.9938
GOTERM_BP_FAT	GO:0007059~chromosome segregation	7	0.657895	0.0988694	FMN2,INCENP,SGOL1,STAG3,CENPE,9130404D08RIK,BUB3	679	64	13588	2.18879	1	0.955284	84.1507
GOTERM_BP_FAT	GO:0043549~regulation of kinase activity	15	1.40977	0.0997741	CAV3,CSF1,TRIB3,AK077138,CENPE,TLR4,PXN,TRIB2,APP,CD81,TSC2,DUSP16,DGKZ,MAPK8IP3,MAPKBP1	679	192	13588	1.56342	1	0.955011	84.4299

## Sheet: Sheet2
Category	Term	Count	%	PValue	Genes	List Total	Pop Hits	Pop Total	Fold Enrichment	Bonferroni	Benjamini	FDR
GOTERM_MF_FAT	GO:0032555~purine ribonucleotide binding	126	11.8421	5.44871e-06	NM_028782,PI4K2B,MAP3K6,PRKAR2A,OPLAH,ILK,MOS,DHX33,RAB24,PMS2,DDX20,DHX30,GNL2,SCAMP3,CARS,OPA1,TNIK,STK25,KIF5A,PIK3CD,MYH9,MARK3,CDKL2,STK3,MAP4K5,CDKL1,RAB18,SCYL2,ATP2C1,RAB19,OAS1B,RIPK3,DDX31,LRRK1,CLCN3,GCLC,NEK3,FGR,CHKB,MAP4K1,ABCA1,EPHB2,RAB7,TTBK2,GMPPA,TUBE1,SUPV3L1,BC060059,DDX41,ENTPD1,RAB8B,NIN,TAOK1,MYO1G,ATP11A,ATP13A3,ABCB6,RAB33B,HYOU1,EPHA4,PLK4,M79314,PLK3,CCT4,RAP1B,FUK,CLC…	635	1796	13288	1.46808	0.00403479	0.00403479	0.00828075
GOTERM_MF_FAT	GO:0032553~ribonucleotide binding	126	11.8421	5.44871e-06	NM_028782,PI4K2B,MAP3K6,PRKAR2A,OPLAH,ILK,MOS,DHX33,RAB24,PMS2,DDX20,DHX30,GNL2,SCAMP3,CARS,OPA1,TNIK,STK25,KIF5A,PIK3CD,MYH9,MARK3,CDKL2,STK3,MAP4K5,CDKL1,RAB18,SCYL2,ATP2C1,RAB19,OAS1B,RIPK3,DDX31,LRRK1,CLCN3,GCLC,NEK3,FGR,CHKB,MAP4K1,ABCA1,EPHB2,RAB7,TTBK2,GMPPA,TUBE1,SUPV3L1,BC060059,DDX41,ENTPD1,RAB8B,NIN,TAOK1,MYO1G,ATP11A,ATP13A3,ABCB6,RAB33B,HYOU1,EPHA4,PLK4,M79314,PLK3,CCT4,RAP1B,FUK,CLC…	635	1796	13288	1.46808	0.00403479	0.00403479	0.00828075
GOTERM_MF_FAT	GO:0017076~purine nucleotide binding	130	12.218	5.92027e-06	LDHD,NM_028782,PI4K2B,MAP3K6,PRKAR2A,OPLAH,ILK,MOS,DHX33,RAB24,PMS2,DDX20,DHX30,GNL2,SCAMP3,CARS,OPA1,TNIK,STK25,KIF5A,PIK3CD,MYH9,MARK3,CDKL2,STK3,MAP4K5,CDKL1,RAB18,SCYL2,ATP2C1,RAB19,OAS1B,RIPK3,DDX31,LRRK1,CLCN3,ACADSB,GCLC,NEK3,FGR,CHKB,MAP4K1,ABCA1,EPHB2,RAB7,TTBK2,GMPPA,TUBE1,SUPV3L1,BC060059,DDX41,ENTPD1,RAB8B,NIN,TAOK1,MYO1G,ATP11A,ATP13A3,ABCB6,RAB33B,HYOU1,EPHA4,PLK4,CCT4,M79314,PLK3,R…	635	1871	13288	1.45397	0.00438322	0.00219402	0.00899737
GOTERM_MF_FAT	GO:0001882~nucleoside binding	110	10.3383	1.9525e-05	LDHD,NM_028782,PI4K2B,MAP3K6,PRKAR2A,OPLAH,ILK,MOS,DHX33,PMS2,DDX20,DHX30,SCAMP3,CARS,TNIK,STK25,KIF5A,PIK3CD,MYH9,MARK3,CDKL2,STK3,MAP4K5,CDKL1,RAB18,SCYL2,ATP2C1,OAS1B,RIPK3,DDX31,LRRK1,CLCN3,ACADSB,GCLC,NEK3,FGR,CHKB,MAP4K1,ABCA1,EPHB2,TTBK2,SUPV3L1,DDX41,ENTPD1,BC060059,TAOK1,MYO1G,ATP11A,ATP13A3,ABCB6,HYOU1,EPHA4,PLK4,PLK3,CCT4,FUK,CLCN7,ACAD10,DDX52,ABCF1,MYO7A,FASTK,KCNJ10,SLFN3,FES,NM_021…	635	1558	13288	1.47744	0.0143833	0.00481759	0.0296704
GOTERM_MF_FAT	GO:0032559~adenyl ribonucleotide binding	104	9.77444	2.52893e-05	NM_028782,PI4K2B,MAP3K6,PRKAR2A,OPLAH,ILK,MOS,DHX33,PMS2,DDX20,DHX30,SCAMP3,CARS,TNIK,STK25,KIF5A,PIK3CD,MYH9,MARK3,CDKL2,STK3,MAP4K5,CDKL1,RAB18,SCYL2,ATP2C1,OAS1B,RIPK3,DDX31,LRRK1,CLCN3,GCLC,NEK3,FGR,CHKB,MAP4K1,ABCA1,EPHB2,TTBK2,SUPV3L1,DDX41,ENTPD1,BC060059,TAOK1,MYO1G,ATP11A,ATP13A3,ABCB6,HYOU1,EPHA4,PLK4,PLK3,CCT4,FUK,CLCN7,DDX52,ABCF1,MYO7A,FASTK,KCNJ10,SLFN3,FES,NM_021537,ACVR1B,PAK7,MCM…	635	1460	13288	1.49062	0.0185899	0.00468023	0.0384283
GOTERM_MF_FAT	GO:0030554~adenyl nucleotide binding	108	10.1504	2.82409e-05	LDHD,NM_028782,PI4K2B,MAP3K6,PRKAR2A,OPLAH,ILK,MOS,DHX33,PMS2,DDX20,DHX30,SCAMP3,CARS,TNIK,STK25,KIF5A,PIK3CD,MYH9,MARK3,CDKL2,STK3,MAP4K5,CDKL1,RAB18,SCYL2,ATP2C1,OAS1B,RIPK3,DDX31,LRRK1,CLCN3,ACADSB,GCLC,NEK3,FGR,CHKB,MAP4K1,ABCA1,EPHB2,TTBK2,SUPV3L1,DDX41,ENTPD1,BC060059,TAOK1,MYO1G,ATP11A,ATP13A3,ABCB6,HYOU1,EPHA4,PLK4,PLK3,CCT4,FUK,CLCN7,ACAD10,DDX52,ABCF1,MYO7A,FASTK,KCNJ10,SLFN3,FES,NM_021…	635	1535	13288	1.47232	0.020737	0.00418224	0.0429125
GOTERM_MF_FAT	GO:0000166~nucleotide binding	143	13.4398	3.79767e-05	NM_011663,2610101N10RIK,LDHD,PGD,NM_028782,PI4K2B,SFRS6,MAP3K6,PRKAR2A,OPLAH,ILK,MOS,PMS2,DHX33,RAB24,DDX20,RBM10,DHX30,GNL2,SCAMP3,CARS,OPA1,TNIK,STK25,KIF5A,POLE,PIK3CD,MYH9,MARK3,CDKL2,STK3,MAP4K5,CDKL1,RAB18,SCYL2,ATP2C1,RAB19,OAS1B,RIPK3,DDX31,LRRK1,CLCN3,ACADSB,GCLC,NEK3,FGR,CHKB,MYEF2,MAP4K1,ABCA1,RAB7,EPHB2,TTBK2,GMPPA,TUBE1,SUPV3L1,BC060059,DDX41,ENTPD1,RAB8B,NIN,TAOK1,MYO1G,ATP11A,ATP13…	635	2183	13288	1.37078	0.0277859	0.00468553	0.0577022
GOTERM_MF_FAT	GO:0001883~purine nucleoside binding	108	10.1504	4.03519e-05	LDHD,NM_028782,PI4K2B,MAP3K6,PRKAR2A,OPLAH,ILK,MOS,DHX33,PMS2,DDX20,DHX30,SCAMP3,CARS,TNIK,STK25,KIF5A,PIK3CD,MYH9,MARK3,CDKL2,STK3,MAP4K5,CDKL1,RAB18,SCYL2,ATP2C1,OAS1B,RIPK3,DDX31,LRRK1,CLCN3,ACADSB,GCLC,NEK3,FGR,CHKB,MAP4K1,ABCA1,EPHB2,TTBK2,SUPV3L1,DDX41,ENTPD1,BC060059,TAOK1,MYO1G,ATP11A,ATP13A3,ABCB6,HYOU1,EPHA4,PLK4,PLK3,CCT4,FUK,CLCN7,ACAD10,DDX52,ABCF1,MYO7A,FASTK,KCNJ10,SLFN3,FES,NM_021…	635	1548	13288	1.45995	0.0294979	0.00426826	0.0613102
GOTERM_MF_FAT	GO:0005524~ATP binding	102	9.58647	4.26256e-05	NM_028782,PI4K2B,MAP3K6,OPLAH,ILK,MOS,DHX33,PMS2,DDX20,DHX30,SCAMP3,CARS,TNIK,STK25,KIF5A,PIK3CD,MYH9,MARK3,CDKL2,STK3,MAP4K5,CDKL1,RAB18,SCYL2,ATP2C1,OAS1B,RIPK3,DDX31,LRRK1,CLCN3,GCLC,NEK3,FGR,CHKB,MAP4K1,ABCA1,EPHB2,TTBK2,SUPV3L1,ENTPD1,DDX41,BC060059,TAOK1,MYO1G,ATP11A,ATP13A3,ABCB6,HYOU1,EPHA4,PLK4,PLK3,CCT4,FUK,CLCN7,DDX52,ABCF1,MYO7A,FASTK,KCNJ10,SLFN3,FES,NM_021537,ACVR1B,PAK7,MCM8,SLC22A…	635	1443	13288	1.47918	0.0311339	0.0039458	0.0647636
GOTERM_MF_FAT	GO:0003677~DNA binding	115	10.8083	0.000507995	ARNT2,NM_028782,XRCC1,LASS6,RFXAP,APP,SIN3B,MUTYH,PRIM2,HOXC5,PMS2,DDX20,ZFP276,DNAJC1,TBPL1,NM_026107,POLG,OBOX3,POLE,ZFP467,OBOX5,ZHX3,TAF6L,PROX1,ZFP592,CHRAC1,NM_026014,SMARCE1,MGA,ZFP516,HMGB1,NM_198644,MYEF2,SFPI1,LIN28B,CXXC1,PEG10,ZFP451,SUPV3L1,DNMT3B,TCF3,TRPC2,MAFF,AEBP2,MAFB,AK161656,FOXP3,SHOX2,HDAC3,ETS1,TRPS1,ETS2,RFX3,HIVEP1,TMPO,ADAR,TAF1B,PTGES2,E2F5,E2F6,AK084443,MCM8,AK052672,…	635	1781	13288	1.3512	0.314103	0.0410267	0.769284
GOTERM_MF_FAT	GO:0016887~ATPase activity	27	2.53759	0.000959027	ABCF1,ATP1B1,ATP1B3,NM_028782,DNAHC11,ABCA1,CHD1L,TAP2,DHX16,DHX33,ATP5O,DDX20,DDX41,DHX30,RTEL1,ATP1A3,ATP11A,MYH9,ATP13A3,ABCB6,TTF2,AK080543,ATP2C1,DDX31,KATNAL1,DDX52,ATP8A1	635	281	13288	2.01068	0.509309	0.0687188	1.44767
GOTERM_MF_FAT	GO:0042623~ATPase activity, coupled	23	2.16165	0.00100638	ATP1B1,ATP1B3,ATP1A3,NM_028782,ATP11A,MYH9,ATP13A3,ABCB6,TTF2,AK080543,ATP2C1,TAP2,DHX16,DDX31,DHX33,ATP5O,DDX20,DDX41,DHX30,KATNAL1,RTEL1,DDX52,ATP8A1	635	223	13288	2.15829	0.526266	0.0656638	1.51864
GOTERM_MF_FAT	GO:0043167~ion binding	219	20.5827	0.00416847	NM_011663,ATP1B1,SCN3A,ATP1B3,SCN3B,PRIM1,MAP3K6,ZFP472,APP,PRIM2,GIT2,POLG,POLE,ZFP467,ZHX3,SPIRE1,CYP2E1,SAG,CATSPER2,ATP2C1,4732418C07RIK,ADAMTS1,CLCN3,AHCY,NM_198644,NEK3,SFXN4,PXN,CALU,ZFP451,ARG2,SLC31A1,SEC23IP,DNMT3B,PLAGL2,TRPC2,GPD2,SCD1,AEBP2,AGBL3,SCD2,5730577I03RIK,ATP11A,SMYD2,ATP13A3,TAX1BP1,NM_175097,KCNJ6,TRPS1,CYP2R1,XM_129042,CLCN7,ADAR,COPS5,TRPV2,A630033E08RIK,KCNJ10,MMP28,KC…	635	3934	13288	1.16492	0.954927	0.227628	6.15125
GOTERM_MF_FAT	GO:0046872~metal ion binding	214	20.1128	0.00530644	NM_011663,ATP1B1,SCN3A,ATP1B3,SCN3B,PRIM1,MAP3K6,ZFP472,APP,PRIM2,GIT2,POLG,POLE,ZFP467,ZHX3,SPIRE1,CYP2E1,SAG,CATSPER2,ATP2C1,4732418C07RIK,ADAMTS1,AHCY,NM_198644,NEK3,SFXN4,PXN,CALU,ZFP451,ARG2,SLC31A1,SEC23IP,DNMT3B,PLAGL2,GPD2,SCD1,TRPC2,AEBP2,AGBL3,SCD2,5730577I03RIK,ATP11A,SMYD2,ATP13A3,TAX1BP1,NM_175097,KCNJ6,TRPS1,CYP2R1,XM_129042,ADAR,COPS5,TRPV2,A630033E08RIK,KCNJ10,MMP28,KCNK13,NM_0215…	635	3850	13288	1.16316	0.980704	0.261904	7.76801
GOTERM_MF_FAT	GO:0005178~integrin binding	6	0.56391	0.00583732	VWF,NISCH,LAMA5,ITGA5,ITGB3,ANGPTL3	635	25	13288	5.02224	0.987015	0.266761	8.51331
GOTERM_MF_FAT	GO:0016779~nucleotidyltransferase activity	14	1.31579	0.00758044	GLRB,POLR3H,POLG,POLE,GALT,POLA2,POLR2B,PRIM1,CHRAC1,PRIM2,AK052672,GMPPA,OAS1B,FPGT	635	127	13288	2.3068	0.996469	0.313678	10.9211
GOTERM_MF_FAT	GO:0043169~cation binding	214	20.1128	0.00796445	NM_011663,ATP1B1,SCN3A,ATP1B3,SCN3B,PRIM1,MAP3K6,ZFP472,APP,PRIM2,GIT2,POLG,POLE,ZFP467,ZHX3,SPIRE1,CYP2E1,SAG,CATSPER2,ATP2C1,4732418C07RIK,ADAMTS1,AHCY,NM_198644,NEK3,SFXN4,PXN,CALU,ZFP451,ARG2,SLC31A1,SEC23IP,DNMT3B,PLAGL2,GPD2,SCD1,TRPC2,AEBP2,AGBL3,SCD2,5730577I03RIK,ATP11A,SMYD2,ATP13A3,TAX1BP1,NM_175097,KCNJ6,TRPS1,CYP2R1,XM_129042,ADAR,COPS5,TRPV2,A630033E08RIK,KCNJ10,MMP28,KCNK13,NM_0215…	635	3885	13288	1.15268	0.99735	0.309839	11.4436
GOTERM_MF_FAT	GO:0004672~protein kinase activity	42	3.94737	0.00824703	FGR,NEK3,FASTK,MAP4K1,TRIB3,FES,TRIB2,POLR2B,EPHB2,NM_021537,ACVR1B,PAK7,MAP3K6,TTBK2,MAP3K3,ILK,MOS,EEF2K,CDC7,SCAMP3,TNIK,STK25,TAOK1,TRPM7,PHKG2,TRIM28,CDK9,MARK3,CDKL2,CDK2,STK3,MAST3,EPHA4,MAP4K5,CCND1,PLK4,PLK3,CDKL1,SCYL2,CDAN1,MAPK14,RIPK3,NM_153788,LRRK1	635	583	13288	1.50753	0.997855	0.303335	11.8262
GOTERM_MF_FAT	GO:0042625~ATPase activity, coupled to transmembrane movement of ions	9	0.845865	0.0165467	ATP1B1,AK080543,ATP1B3,ATP2C1,ATP1A3,ATP11A,ATP5O,ATP13A3,ATP8A1	635	69	13288	2.72948	0.999996	0.497319	22.3986
GOTERM_MF_FAT	GO:0042626~ATPase activity, coupled to transmembrane movement of substances	11	1.03383	0.0171581	ATP1B1,AK080543,ATP1B3,ATP2C1,TAP2,ATP1A3,ATP11A,ATP5O,ATP13A3,ABCB6,ATP8A1	635	97	13288	2.37305	0.999997	0.491294	23.1286
GOTERM_MF_FAT	GO:0016820~hydrolase activity, acting on acid anhydrides, catalyzing transmembrane movement of substances	11	1.03383	0.0171581	ATP1B1,AK080543,ATP1B3,ATP2C1,TAP2,ATP1A3,ATP11A,ATP5O,ATP13A3,ABCB6,ATP8A1	635	97	13288	2.37305	0.999997	0.491294	23.1286
GOTERM_MF_FAT	GO:0043492~ATPase activity, coupled to movement of substances	11	1.03383	0.0171581	ATP1B1,AK080543,ATP1B3,ATP2C1,TAP2,ATP1A3,ATP11A,ATP5O,ATP13A3,ABCB6,ATP8A1	635	97	13288	2.37305	0.999997	0.491294	23.1286
GOTERM_MF_FAT	GO:0005319~lipid transporter activity	7	0.657895	0.0173629	STARD3,SLC27A1,NOLC1,STAR,ATP11A,ABCA1,ATP8A1	635	44	13288	3.32913	0.999998	0.477862	23.3717
GOTERM_MF_FAT	GO:0015662~ATPase activity, coupled to transmembrane movement of ions, phosphorylative mechanism	8	0.75188	0.0181589	ATP1B1,AK080543,ATP1B3,ATP2C1,ATP1A3,ATP11A,ATP13A3,ATP8A1	635	57	13288	2.93698	0.999999	0.476654	24.3097
GOTERM_MF_FAT	GO:0004674~protein serine/threonine kinase activity	31	2.91353	0.0185116	NEK3,FASTK,MAP4K1,NM_021537,PAK7,MAP3K6,ACVR1B,MAP3K3,TTBK2,ILK,EEF2K,MOS,CDC7,SCAMP3,TNIK,STK25,TRPM7,TAOK1,PHKG2,CDK9,MARK3,CDKL2,STK3,CDK2,MAST3,MAP4K5,PLK4,CDKL1,PLK3,MAPK14,CDAN1,RIPK3,LRRK1	635	421	13288	1.54087	0.999999	0.467513	24.7218
GOTERM_MF_FAT	GO:0008375~acetylglucosaminyltransferase activity	6	0.56391	0.0215126	NM_019543,OGT,EXT1,EXTL1,PIGQ,EXTL2	635	34	13288	3.69282	1	0.504203	28.1451
GOTERM_MF_FAT	GO:0019887~protein kinase regulator activity	8	0.75188	0.0216072	ELP4,HMGB1,PRKAR2A,CCND1,TRIB3,CAMK2N1,ROPN1L,TRIB2	635	59	13288	2.83742	1	0.49102	28.2506
GOTERM_MF_FAT	GO:0015405~P-P-bond-hydrolysis-driven transmembrane transporter activity	11	1.03383	0.031542	ATP1B1,AK080543,ATP1B3,ATP2C1,TAP2,ATP1A3,ATP11A,ATP5O,ATP13A3,ABCB6,ATP8A1	635	107	13288	2.15127	1	0.613742	38.5598
GOTERM_MF_FAT	GO:0032403~protein complex binding	9	0.845865	0.0320776	VWF,ACVR1B,IRS3,NISCH,LAMA5,ITGA5,CETN2,ITGB3,ANGPTL3	635	78	13288	2.41454	1	0.605624	39.0742
GOTERM_MF_FAT	GO:0015399~primary active transmembrane transporter activity	11	1.03383	0.0333407	ATP1B1,AK080543,ATP1B3,ATP2C1,TAP2,ATP1A3,ATP11A,ATP5O,ATP13A3,ABCB6,ATP8A1	635	108	13288	2.13135	1	0.606185	40.2714
GOTERM_MF_FAT	GO:0000287~magnesium ion binding	29	2.72556	0.034938	GCLC,NEK3,ADPGK,PSPH,POLR2B,NM_021537,MAP3K6,ACVR1B,ERCC5,MAP3K3,ENO3,ENTPD1,APEX1,ACSL6,NT5C,ENO1,CDC7,STK25,POLG,ATP1A3,ATP11A,PDE10A,ATP13A3,STK3,ARL3,MAST3,AK080543,ATP2C1,LRRK1,ATP8A1	635	409	13288	1.48375	1	0.610315	41.7539
GOTERM_MF_FAT	GO:0005262~calcium channel activity	8	0.75188	0.0427241	TRPC2,CATSPER2,TRPM7,CACNG7,TRPV2,TRPA1,TRPV5,TRPM2	635	68	13288	2.46188	1	0.672801	48.5011
GOTERM_MF_FAT	GO:0004386~helicase activity	12	1.12782	0.0442919	CHD9,CHD1L,DHX16,DHX33,DDX31,SUPV3L1,DDX20,DDX41,DHX30,TTF2,RTEL1,DDX52	635	129	13288	1.9466	1	0.67388	49.7682
GOTERM_MF_FAT	GO:0008509~anion transmembrane transporter activity	12	1.12782	0.0464028	GABRG1,SLC1A5,GLRB,SLC26A6,CLCN3,GABRA4,SLC22A9,SLCO4A1,SLC4A7,ABCA1,CLCN7,SLC26A11	635	130	13288	1.93163	1	0.679306	51.4282
GOTERM_MF_FAT	GO:0070035~purine NTP-dependent helicase activity	9	0.845865	0.0524156	DHX16,DHX33,DDX31,DDX20,DDX41,DHX30,TTF2,RTEL1,DDX52	635	86	13288	2.18993	1	0.713036	55.8802
GOTERM_MF_FAT	GO:0008026~ATP-dependent helicase activity	9	0.845865	0.0524156	DHX16,DHX33,DDX31,DDX20,DDX41,DHX30,TTF2,RTEL1,DDX52	635	86	13288	2.18993	1	0.713036	55.8802
GOTERM_MF_FAT	GO:0019207~kinase regulator activity	8	0.75188	0.0587917	ELP4,HMGB1,PRKAR2A,CCND1,TRIB3,CAMK2N1,ROPN1L,TRIB2	635	73	13288	2.29326	1	0.743948	60.1828
GOTERM_MF_FAT	GO:0015082~di-, tri-valent inorganic cation transmembrane transporter activity	5	0.469925	0.0641388	AK080543,ATP2C1,SLC30A5,SLC31A1,TRPM2	635	32	13288	3.26969	1	0.764641	63.4855
GOTERM_MF_FAT	GO:0046914~transition metal ion binding	141	13.2519	0.0647752	NM_011663,CNDP1,PRIM1,ZFP472,TRIM47,APP,MUTYH,CYP2J11,PRIM2,GIT2,SLC25A28,ZFP276,RBM10,CARS,NM_026107,POLE,ZFP467,ZHX3,SPIRE1,CYP2E1,ZFP592,ATP2C1,NM_010870,PYGO1,CAR9,ADAMTS1,CPD,ZFP516,LRRK1,TRAF1,FGD2,AHCY,NM_198644,SFXN4,EXTL2,LIN28B,PXN,RABGGTA,CXXC1,PEG10,ZFP451,ARG2,QTRTD1,SLC30A5,ADAM30,DDX41,DNMT3B,SLC31A1,PLAGL2,TAF2,SCD1,AEBP2,AGBL3,B4GALT3,SCD2,EHMT1,LPP,ZMYM6,5730577I03RIK,GALT,SMYD2…	635	2608	13288	1.13135	1	0.75822	63.861
GOTERM_MF_FAT	GO:0019001~guanyl nucleotide binding	25	2.34962	0.0650896	RAB7,GMPPA,TUBE1,RAB24,RHOC,GNL2,EIF2S3Y,RAB8B,OPA1,NIN,NM_199301,NM_207231,NM_146167,PDE10A,NM_178069,RAB33B,ARL3,GNAL,M79314,GNAQ,RAB18,RAB19,RAP1B,GNAS,LRRK1,ARL13A	635	363	13288	1.44118	1	0.750232	64.0452
GOTERM_MF_FAT	GO:0032561~guanyl ribonucleotide binding	25	2.34962	0.0650896	RAB7,GMPPA,TUBE1,RAB24,RHOC,GNL2,EIF2S3Y,RAB8B,OPA1,NIN,NM_199301,NM_207231,NM_146167,PDE10A,NM_178069,RAB33B,ARL3,GNAL,M79314,GNAQ,RAB18,RAB19,RAP1B,GNAS,LRRK1,ARL13A	635	363	13288	1.44118	1	0.750232	64.0452
GOTERM_MF_FAT	GO:0015248~sterol transporter activity	3	0.281955	0.0654874	STARD3,STAR,ABCA1	635	9	13288	6.97533	1	0.742894	64.2771
GOTERM_MF_FAT	GO:0017127~cholesterol transporter activity	3	0.281955	0.0654874	STARD3,STAR,ABCA1	635	9	13288	6.97533	1	0.742894	64.2771
GOTERM_MF_FAT	GO:0008270~zinc ion binding	115	10.8083	0.0757394	NM_011663,CNDP1,PRIM1,TRIM47,ZFP472,APP,GIT2,RBM10,ZFP276,CARS,NM_026107,POLE,ZFP467,ZHX3,SPIRE1,ZFP592,NM_010870,PYGO1,CAR9,ADAMTS1,CPD,ZFP516,TRAF1,FGD2,NM_198644,LIN28B,PXN,CXXC1,RABGGTA,PEG10,ZFP451,QTRTD1,SLC30A5,ADAM30,DDX41,DNMT3B,PLAGL2,TAF2,AGBL3,AEBP2,EHMT1,LPP,ZMYM6,5730577I03RIK,GALT,SMYD2,FOXP3,TAX1BP1,NM_175097,TRIM55,ZFP142,TRPS1,HIVEP1,XM_129042,HDAC6,ADAR,SEC24B,SOLH,COPS5,MLPH,A…	635	2105	13288	1.14322	1	0.785172	69.791
GOTERM_MF_FAT	GO:0005391~sodium:potassium-exchanging ATPase activity	3	0.281955	0.0793381	ATP1B1,ATP1B3,ATP1A3	635	10	13288	6.2778	1	0.792517	71.5301
GOTERM_MF_FAT	GO:0019899~enzyme binding	17	1.59774	0.0817546	AK015925,MLPH,TAF7,TRIB3,AK077138,CENPE,CAMK2N1,NM_007615,NRIP1,VWF,CCND1,ARG2,NM_145220,MAPK8IP3,CUL4B,GGA2,GGA3	635	229	13288	1.55346	1	0.794465	72.6448
GOTERM_MF_FAT	GO:0022890~inorganic cation transmembrane transporter activity	11	1.03383	0.0819871	AK080543,COX8B,COX7A1,ATP2C1,SLC22A4,NM_011270,ATP1A3,SLC30A5,ATP5O,SLC31A1,TRPM2	635	127	13288	1.81249	1	0.787356	72.7499
GOTERM_MF_FAT	GO:0005525~GTP binding	24	2.25564	0.0822919	RAB7,GMPPA,TUBE1,RAB24,RHOC,GNL2,EIF2S3Y,RAB8B,OPA1,NIN,NM_199301,NM_207231,NM_146167,NM_178069,ARL3,RAB33B,GNAL,M79314,RAB18,GNAQ,RAB19,GNAS,RAP1B,LRRK1,ARL13A	635	354	13288	1.41871	1	0.780662	72.8871
GOTERM_MF_FAT	GO:0034062~RNA polymerase activity	5	0.469925	0.0836697	PRIM1,POLR3H,PRIM2,AK052672,POLR2B	635	35	13288	2.98943	1	0.7786	73.4992
GOTERM_MF_FAT	GO:0003899~DNA-directed RNA polymerase activity	5	0.469925	0.0836697	PRIM1,POLR3H,PRIM2,AK052672,POLR2B	635	35	13288	2.98943	1	0.7786	73.4992
GOTERM_MF_FAT	GO:0030306~ADP-ribosylation factor binding	2	0.18797	0.0931514	GGA2,GGA3	635	2	13288	20.926	1	0.807743	77.3742
GOTERM_MF_FAT	GO:0004850~uridine phosphorylase activity	2	0.18797	0.0931514	UPP1,UPP2	635	2	13288	20.926	1	0.807743	77.3742
GOTERM_MF_FAT	GO:0010858~calcium-dependent protein kinase regulator activity	2	0.18797	0.0931514	HMGB1,CAMK2N1	635	2	13288	20.926	1	0.807743	77.3742
GOTERM_MF_FAT	GO:0004647~phosphoserine phosphatase activity	2	0.18797	0.0931514	VPS29,PSPH	635	2	13288	20.926	1	0.807743	77.3742
GOTERM_MF_FAT	GO:0034483~heparan sulfate sulfotransferase activity	3	0.281955	0.0939953	NDST3,HS3ST3A1,NDST2	635	11	13288	5.70709	1	0.803606	77.6921
GOTERM_MF_FAT	GO:0008134~transcription factor binding	20	1.8797	0.0957617	AEBP2,COPS5,MSH5,TRIM28,ARNT2,TRIB3,FOXP3,NRIP1,JMY,RGL2,MAGED1,HDAC3,SIN3B,DIP2C,RAB18,NPAT,TCF3,APEX1,TOB2,TRAPPC2	635	288	13288	1.45319	1	0.802838	78.344
